# Supplementary material
Source: HighWire-hosted journal article supplement (http://www.jneurosci.org/highwire/filestream/599540/field_highwire_adjunct_files/0/Supplemental_Fig_1.pdf)
Supplement: Supplemental_Fig_1.pdf [file Supplemental_Fig_1.pdf]

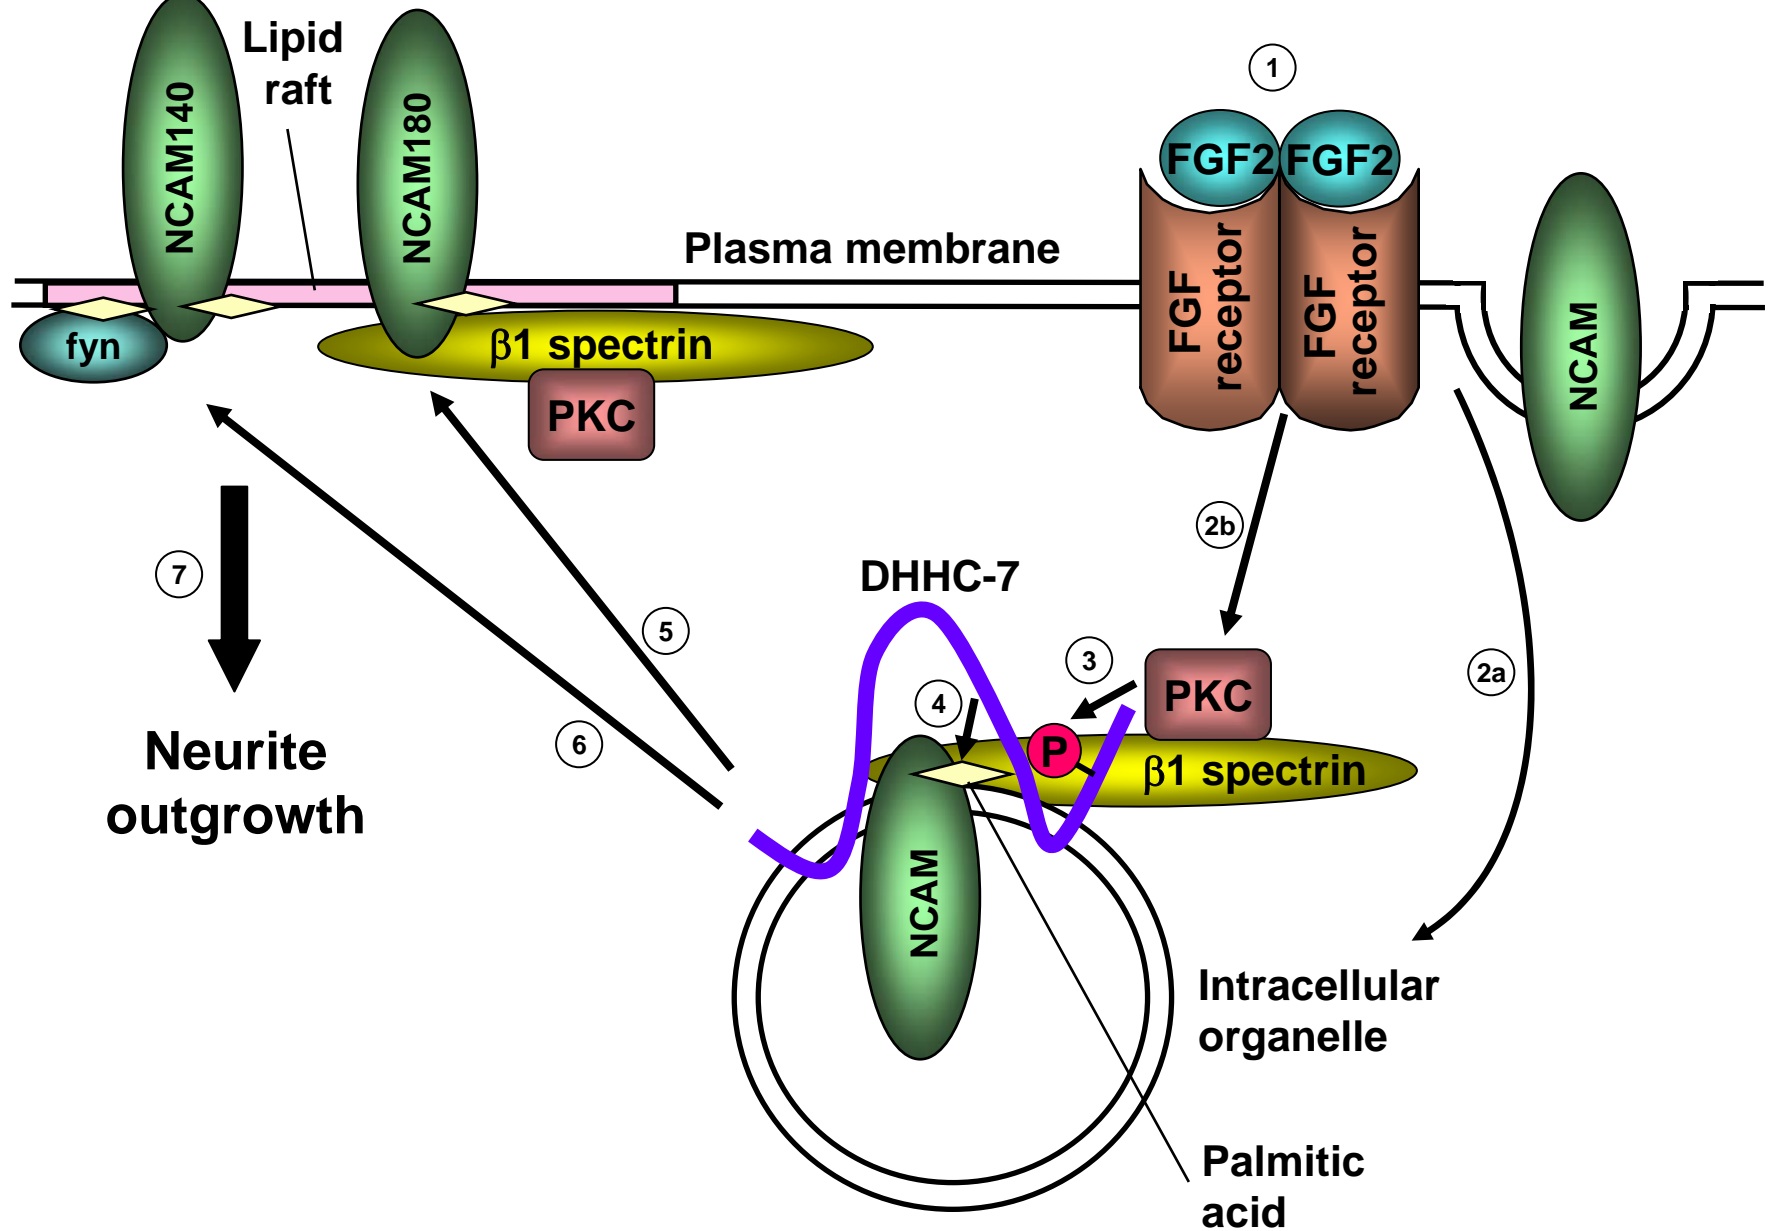

**Suppl. Fig. 1. Hypothetical model of FGF-regulated NCAM palmitoylation and redistribution to lipid rafts**  
 Activation of FGF receptors with FGF2 (1) may result in endocytosis of NCAM (2a) and/or activation of PKC (2b) followed by phosphorylation of DHHC-7 (3) associated with intracellular organelles transporting NCAM. Spectrin may function as a scaffold promoting phosphorylation of proteins by PKC in proximity to NCAM. PKC-phosphorylated DHHC-7 may palmitoylate NCAM (4) more efficiently than the non-phosphorylated form. After fusion of organelles with the plasma membrane, palmitoylated NCAM180 accumulates in lipid rafts in association with spectrin and PKC (5). Palmitoylated NCAM140 signals in lipid rafts via the fyn kinase (6). Signaling via PKC and fyn stimulates neurite outgrowth (7).
